# Supplementary material for: Development of an RF-EMF Exposure Surrogate for Epidemiologic Research
Source: Int J Environ Res Public Health. 2015 May 22;12(5):5634–56. doi: 10.3390/ijerph120505634 (PMC4454989; doi:10.3390/ijerph120505634)
Supplement: Supplementary File 1 [file ijerph-12-05634-s001.pdf]

## Development of an RF-EMF Exposure Surrogate for Epidemiologic Research

**Table S1.** WLAN prediction model: predicted far-field WLAN exposure contribution from a multivariable regression model using bootstrap (1000 replications),  $n = 95$ .

| Mean WLAN Personal Measurements ( $\mu\text{W}/\text{m}^2$ ) | Exposure Contribution ( $\mu\text{W}/\text{m}^2$ ) | 95% Confidence Interval | $p$ -Value |
|--------------------------------------------------------------|----------------------------------------------------|-------------------------|------------|
| WLAN in school                                               | 0.49                                               | (-1.29, 2.26)           | 0.589      |
| WLAN at home and not switched off during night               | 1.02                                               | (-0.80, 2.83)           | 0.272      |
| Time spent in trains (min/day)                               | 0.07                                               | (-0.06, 0.19)           | 0.290      |
| Unexplained by the model                                     | 1.00                                               | (-0.51, 2.52)           | 0.195      |

**Table S2.** Uplink prediction model: predicted far-field uplink exposure contribution from a multivariable regression model using bootstrap (1000 replications),  $n = 95$ .

| Mean Uplink Personal Measurements ( $\mu\text{W}/\text{m}^2$ ) | Exposure Contribution ( $\mu\text{W}/\text{m}^2$ ) | 95% Confidence Interval | $p$ -Value |
|----------------------------------------------------------------|----------------------------------------------------|-------------------------|------------|
| Number of smartphones at home                                  | 9.39                                               | (-6.33, 25.12)          | 0.242      |
| Time spent in trains (min/day)                                 | 1.06                                               | (0.24, 1.87)            | 0.011      |
| Time spent in buses (min/day)                                  | 0.64                                               | (-0.02, 1.30)           | 0.057      |
| Unexplained by the model                                       | 7.89                                               | (-18.40, 34.18)         | 0.556      |

**Table S3.** Mean exposure duration (per day) of the different locations for the calculation of the far-field dose.

| Location                          | Mean Exposure Duration (per day) |
|-----------------------------------|----------------------------------|
| Home day <sup>1</sup>             | 8 h 21 min                       |
| Home night <sup>1</sup>           | 7 h 21 min                       |
| Home                              | 15 h 41 min                      |
| School                            | 4 h 43 min                       |
| Outside                           | 1 h 41 min                       |
| Train                             | 0 h 6 min                        |
| Bus                               | 0 h 9 min                        |
| Car                               | 0 h 13 min                       |
| Unspecified location <sup>2</sup> | 1 h 27 min                       |

<sup>1</sup> Home day and night: Home day means the time being at home in the time period 6:00 until 22:00; Home night means the time being at home in the time period 22:00 until 6:00; <sup>2</sup> Unspecified location means diary entries recorded as miscellaneous or other activity or location than the prespecified activities and locations in the time-activity diary.

**Table S4.** Measured, modelled or predicted mean power flux densities ( $\mu\text{W}/\text{m}^2$ ) at the different locations for the calculation of the far-field dose.

| Band                | Description                                            | Power Flux Density ( $\mu\text{W}/\text{m}^2$ ) |                         |       |        |         |       |       |       |                                   |                          |
|---------------------|--------------------------------------------------------|-------------------------------------------------|-------------------------|-------|--------|---------|-------|-------|-------|-----------------------------------|--------------------------|
|                     |                                                        | Home Day <sup>2</sup>                           | Home Night <sup>2</sup> | Home  | School | Outside | Train | Bus   | Car   | Unspecified Location <sup>3</sup> | Unexplained <sup>4</sup> |
| Radio <sup>1</sup>  | Radio broadcast transmitter                            | 1.73                                            | 1.73                    | —     | 0.77   | —       | —     | —     | —     | —                                 | —                        |
| TV                  | Television broadcast transmitter                       | 0.48                                            | 0.48                    | —     | 0.06   | 4.14    | 7.25  | 24.70 | 4.38  | 6.16                              | —                        |
| Downlink 900        | Transmission from base station to mobile phone handset | 6.52                                            | 4.32                    | —     | 4.98   | 35.80   | 64.30 | 31.60 | 16.60 | 27.60                             | —                        |
| Downlink 1800       | Transmission from base station to mobile phone handset | 5.15                                            | 3.97                    | —     | 3.56   | 5.18    | 8.49  | 7.80  | 5.09  | 9.89                              | —                        |
| Downlink 2100       | Transmission from base station to mobile phone handset | 5.81                                            | 4.15                    | —     | 1.90   | 6.88    | 15.20 | 16.30 | 3.21  | 6.09                              | —                        |
| WLAN                | Wireless local area network                            | —                                               | —                       | 0.56  | 0.18   | —       | 0.24  | —     | —     | —                                 | 1.00                     |
| DECT                | Digital enhanced cordless telecommunications           | —                                               | —                       | 1.18  | —      | —       | —     | —     | —     | —                                 | —                        |
| Uplink <sup>5</sup> | Transmission from mobile phone handset to base station | —                                               | —                       | 21.48 | —      | —       | 3.88  | 7.33  | —     | —                                 | 7.89                     |

For RF-EMF a power flux density of  $1 \mu\text{W}/\text{m}^2 = 0.001 \text{ mW}/\text{m}^2$  corresponds to an electric field strength of  $0.019 \text{ V}/\text{m}$ ; <sup>1</sup> Radio = radio FM (Frequency Modulation) + DAB (Digital Audio Broadcasting); Radio was considered only at home and in school (geospatial propagation modelling) because used exposimeters did not measure radio broadcasting; <sup>2</sup> Home day and night: Home day means the time being at home in the time period 6:00 until 22:00; Home night means the time being at home in the time period 22:00 until 6:00; <sup>3</sup> Unspecified location means diary entries recorded as miscellaneous or other activity or location than the prespecified activities and locations in the time-activity diary; <sup>4</sup> Unexplained means the part of the predicted WLAN and uplink power flux density not explained through the relevant far-field predictors found in the multivariable regression model used to predict WLAN and uplink exposure, respectively; <sup>5</sup> Uplink = Uplink 900 + Uplink 1800 + Uplink 1900.
